# Supplementary material for: TFE3 fusions escape from controlling of mTOR signaling pathway and accumulate in the nucleus promoting genes expression in Xp11.2 translocation renal cell carcinomas
Source: PubMed Central journal article supplement (PMC6408813; doi:10.1186/s13046-019-1101-7), 2019-03-08
Supplement: 13046_2019_1101_MOESM3_ESM.pdf [file 13046_2019_1101_MOESM3_ESM.pdf]

NonO-TFE3 MGSNKTFNLEKQNHTPRKHHQHQQHQQQQQPPPPPIPANGQQASSQNEGLTIDLK 60  
 Wild-typeTFE3 -MSHA-----AE----PA--RDGVEASAEGPRA--VFLLE 27  
 PRCC-TFE3 -MSLVAYA-----SSDESEPDEAEPEPEEEEEAVAPTS GPALGGLFASLP 43  
 \* : \* . . : \*  
 NonO-TFE3 NFRKPGKFTFTQRSRLFVGNLPPDITEE-EMRKLFEKYGKAGEVFIHKDKGFGFIRLETR 119  
 Wild-typeTFE3 ERRPADSAQLLSLNSLLP--E-SGIVADIELENL-----DPDSFYELKSQPL 72  
 PRCC-TFE3 --APKGP-----ALLP--PPPQMLAPAFPPLL-----LPPPTGDPRLQ-- 78  
 . \*: : :: : :

**Rag binding**

NonO-TFE3 TLAEIAKVELDNMPLRGKQLRVRFACHSASLTVRNLPQYVS---NELLEEAFSVFGQVE 175  
 Wild-typeTFE3 PLRSSLPLISLQATPATPATLSA----SSSAGGSRT PAMSSSSSRVLLRQ-----QLM 121  
 PRCC-TFE3 -PPPPLPFGLGGFPVSPVSPA-----E-AAGV----- 104  
 . \* \* . :

NonO-TFE3 RAVVIVDDR-G-RPSGKGIVFSGKPAAR-KAL---DRCSEGSFLLTTFPRPVT-VEPMD 228  
 Wild-typeTFE3 RAQAQEQERREERREQAAAA-PF-PSPAPASPAISVVG-VSAGGHTL-SRPPPA-----Q 171  
 PRCC-TFE3 -----GEGL-GL-GLPSRPGPLNLPPPIGGAGPPL-GLPKPKKRKEPVK 146  
 . . : \*: . : . . \* \* \* .

**PRCC-TFE3 breakpoint**

NonO-TFE3 QLDDEEGLPEKLVIKNQQFHKEREQPPRFAQPGSF EYAYMRWKAL IEMEKQQDQVDRN 288  
 Wild-typeTFE3 -----VPREVL---KVQTHLENTRY-----HLQQARR-----QQVKQY 202  
 PRCC-TFE3 IA----APELHKG---DVQTHLENTRY-----HLQQARR-----QQVKQY 180  
 .. : . \* \* \* : . : \* \* : \* \* :

**Gsk3β mTOR**

NonO-TFE3 IKEA-REKLEMEMEARHEHQVLMRQDL MRRQEELRRMEELHNQEV-----QKRKQLE 341  
 Wild-typeTFE3 LSTTLGPKLAS-----QALTPPPGP-ASAQPLPAPEAAHTTGPTGSAPNSPSMALLT 252  
 PRCC-TFE3 LSTTLGPKLAS-----QALTPPPGP-ASAQPLPAPEAAHTTGPTGSAPNSPSMALLT 230  
 :. : \*\* \* : . : \* \* \* . \*

**NonO-TFE3 breakpoint**

NonO-TFE3 LRQE--EERRRREEE---MRRQEE MRRQQEGFK-GTFPDALPVSGNLLDVYSSQGVA 394  
 Wild-typeTFE3 IGSSSEKEIDDVIDEII SLESSYNDEMLSYLPGGTTGLQLPSTLPVSGNLLDVYSSQGVA 312  
 PRCC-TFE3 IGSSSEKEIDDVIDEII SLESSYNDEMLSYLPGGTTGLQLPSTLPVSGNLLDVYSSQGVA 290  
 : .. :\* :\* :\*: \* . :\*:\*\*\*\*\*

**mTOR and 14-3-3 binding**

NonO-TFE3 TPAITVSNSCPAELPNIKREISET EAKALLKERQKKDNHNL IERRRRFNINDRIKELGTL 454  
 Wild-typeTFE3 TPAITVSNSCPAELPNIKREISET EAKALLKERQKKDNHNL IERRRRFNINDRIKELGTL 372  
 PRCC-TFE3 TPAITVSNSCPAELPNIKREISET EAKALLKERQKKDNHNL IERRRRFNINDRIKELGTL 350  
 \*\*\*\*\*

NonO-TFE3 IPKSSDPEMRWNKGTILKASVDYIRKLQKEQQRSKDLESRQRSLEQANRSLQLRIQELEL 514  
 Wild-typeTFE3 IPKSSDPEMRWNKGTILKASVDYIRKLQKEQQRSKDLESRQRSLEQANRSLQLRIQELEL 432  
 PRCC-TFE3 IPKSSDPEMRWNKGTILKASVDYIRKLQKEQQRSKDLESRQRSLEQANRSLQLRIQELEL 410  
 \*\*\*\*\*

NonO-TFE3 QAQIHGLPVPPTPGLLSLATT SADSLSKPEQLDIEEGRPGAATFHVGGGPAQNAPHQQP 574  
 Wild-typeTFE3 QAQIHGLPVPPTPGLLSLATT SADSLSKPEQLDIEEGRPGAATFHVGGGPAQNAPHQQP 492  
 PRCC-TFE3 QAQIHGLPVPPTPGLLSLATT SADSLSKPEQLDIEEGRPGAATFHVGGGPAQNAPHQQP 470  
 \*\*\*\*\*

NonO-TFE3 PAPPDALLDLHFPSDHLGDLGDPFHLGLEDILMEEEGVVGGLSGGALSPLRAASDPLL 634  
 Wild-typeTFE3 PAPPDALLDLHFPSDHLGDLGDPFHLGLEDILMEEEGVVGGLSGGALSPLRAASDPLL 552  
 PRCC-TFE3 PAPPDALLDLHFPSDHLGDLGDPFHLGLEDILMEEEGVVGGLSGGALSPLRAASDPLL 530  
 \*\*\*\*\*

**PKCβ PKCβ**

NonO-TFE3 SSVSPAVSKASRRSSFSMEEES 657  
 Wild-typeTFE3 SSVSPAVSKASRRSSFSMEEES 575  
 PRCC-TFE3 SSVSPAVSKASRRSSFSMEEES 553  
 \*\*\*\*\*
